# Supplementary material for: Novel prognostic prediction model constructed through machine learning on the basis of methylation-driven genes in kidney renal clear cell carcinoma
Source: PubMed Central journal article supplement (PMC7374278; doi:10.1042/bsr20201604), 2020-07-21
Supplement: BSR-2020-1604_supp.pdf [file BSR-2020-1604_supp.pdf]

| gene       | normalMean  | TumorMean  | logFC      | pValue   | adjustP  | cor        | corPavalue |
|------------|-------------|------------|------------|----------|----------|------------|------------|
| LUCAT1     | 0.603413731 | 0.46292034 | -0.3823836 | 2.79E-69 | 7.41E-67 | -0.4666416 | 1.51E-18   |
| RARRES3    | 0.46420818  | 0.32530655 | -0.5129721 | 1.48E-67 | 3.94E-65 | -0.4098343 | 2.86E-14   |
| MOB3A      | 0.706080858 | 0.55350506 | -0.3512369 | 5.97E-67 | 1.59E-64 | -0.4571732 | 8.90E-18   |
| LGALS12    | 0.569889202 | 0.41249061 | -0.4663202 | 9.15E-67 | 2.43E-64 | -0.706444  | 3.29E-49   |
| NNMT       | 0.501292611 | 0.38607098 | -0.3767869 | 1.54E-66 | 4.11E-64 | -0.4262711 | 1.99E-15   |
| SIRPA      | 0.798533712 | 0.64364475 | -0.3110887 | 6.79E-66 | 1.80E-63 | -0.4114688 | 2.21E-14   |
| CD68       | 0.46134295  | 0.27557967 | -0.7433702 | 1.42E-65 | 3.77E-63 | -0.4072749 | 4.27E-14   |
| SLC16A3    | 0.513635602 | 0.37012782 | -0.4727216 | 2.69E-65 | 7.15E-63 | -0.5230814 | 1.16E-23   |
| NAA11      | 0.743725514 | 0.69338446 | -0.1011148 | 3.55E-65 | 9.43E-63 | -0.503988  | 7.98E-22   |
| LGALS2     | 0.494354182 | 0.32703321 | -0.5961079 | 1.33E-64 | 3.53E-62 | -0.3188293 | 6.38E-09   |
| SLAMF8     | 0.46725757  | 0.34621402 | -0.4325539 | 1.44E-64 | 3.84E-62 | -0.5010551 | 1.49E-21   |
| TNFAIP6    | 0.879446038 | 0.64200047 | -0.4540207 | 1.48E-64 | 3.94E-62 | -0.6001805 | 2.10E-32   |
| TNFSF10    | 0.478160102 | 0.33347129 | -0.5199312 | 2.76E-64 | 7.33E-62 | -0.4593016 | 6.01E-18   |
| TIGIT      | 0.830030159 | 0.72947171 | -0.1863117 | 4.39E-64 | 1.17E-61 | -0.5219856 | 1.49E-23   |
| ITIH4      | 0.747405007 | 0.64254747 | -0.2180872 | 7.51E-64 | 2.00E-61 | -0.3517301 | 1.16E-10   |
| SMYD4      | 0.766321089 | 0.59747509 | -0.3590704 | 1.39E-63 | 3.71E-61 | -0.3818727 | 1.91E-12   |
| ZNF728     | 0.069052938 | 0.22959093 | 1.73329096 | 2.35E-63 | 6.25E-61 | -0.3578481 | 5.21E-11   |
| REG1A      | 0.739836789 | 0.58409803 | -0.3409965 | 1.03E-61 | 2.75E-59 | -0.3196052 | 5.84E-09   |
| C15orf53   | 0.745464744 | 0.629933   | -0.2429417 | 1.87E-61 | 4.99E-59 | -0.4136535 | 1.56E-14   |
| SHMT2      | 0.523300648 | 0.36508092 | -0.5194238 | 1.50E-60 | 4.00E-58 | -0.6249737 | 9.49E-36   |
| TM4SF1     | 0.639648387 | 0.5328248  | -0.2636178 | 4.12E-60 | 1.09E-57 | -0.4161968 | 1.04E-14   |
| FOXI2      | 0.258266384 | 0.36578576 | 0.50213903 | 5.24E-60 | 1.40E-57 | -0.3485504 | 1.74E-10   |
| C11orf21   | 0.682091498 | 0.53137731 | -0.3602287 | 7.58E-60 | 2.02E-57 | -0.3315303 | 1.44E-09   |
| NFE2L3     | 0.365742577 | 0.2610045  | -0.4867539 | 1.00E-59 | 2.66E-57 | -0.606474  | 3.17E-33   |
| SPINK13    | 0.688577409 | 0.35894309 | -0.9398637 | 3.30E-59 | 8.78E-57 | -0.3230408 | 3.92E-09   |
| NKAPL      | 0.346703369 | 0.47422251 | 0.45186228 | 1.75E-58 | 4.65E-56 | -0.4954955 | 4.82E-21   |
| C19orf33   | 0.431767763 | 0.29695619 | -0.5400054 | 2.08E-58 | 5.52E-56 | -0.5577664 | 2.58E-27   |
| FMNL1      | 0.554424772 | 0.45367272 | -0.2893398 | 2.12E-58 | 5.65E-56 | -0.4278373 | 1.54E-15   |
| IFI16      | 0.375873102 | 0.26036027 | -0.5297363 | 3.20E-58 | 8.50E-56 | -0.561286  | 1.04E-27   |
| LINC00944  | 0.339187101 | 0.1907369  | -0.8304973 | 9.28E-58 | 2.47E-55 | -0.5962461 | 6.70E-32   |
| CARD16     | 0.658577491 | 0.5445459  | -0.2742995 | 9.93E-58 | 2.64E-55 | -0.4643568 | 2.33E-18   |
| HAVCR1     | 0.500128788 | 0.3995661  | -0.3238655 | 1.69E-57 | 4.49E-55 | -0.3534627 | 9.25E-11   |
| RNASE2     | 0.650573905 | 0.5518782  | -0.2373631 | 2.77E-57 | 7.38E-55 | -0.4564384 | 1.02E-17   |
| TRAF1      | 0.571773172 | 0.44849348 | -0.3503559 | 3.07E-57 | 8.17E-55 | -0.4112864 | 2.27E-14   |
| LRRC25     | 0.404837168 | 0.26285515 | -0.6230738 | 6.31E-57 | 1.68E-54 | -0.4787784 | 1.44E-19   |
| VAMP5      | 0.343430316 | 0.23419422 | -0.5523119 | 6.98E-57 | 1.86E-54 | -0.4259749 | 2.10E-15   |
| ARHGAP30   | 0.615781928 | 0.49354342 | -0.3192425 | 1.07E-56 | 2.84E-54 | -0.5043288 | 7.42E-22   |
| LINC01315  | 0.303070483 | 0.19934676 | -0.6043732 | 1.93E-56 | 5.14E-54 | -0.4697598 | 8.35E-19   |
| VEGFA      | 0.486542973 | 0.3638322  | -0.419294  | 3.09E-56 | 8.22E-54 | -0.6887196 | 6.68E-46   |
| TGIF2LX    | 0.764022827 | 0.66108915 | -0.2087709 | 3.50E-56 | 9.30E-54 | -0.3384313 | 6.20E-10   |
| PROM2      | 0.714331837 | 0.80932774 | 0.18012962 | 3.70E-56 | 9.83E-54 | -0.5493406 | 2.18E-26   |
| SLC2A3     | 0.328468121 | 0.20303294 | -0.6940396 | 6.52E-56 | 1.74E-53 | -0.3498868 | 1.47E-10   |
| RAB25      | 0.273984134 | 0.39844271 | 0.54027996 | 7.62E-56 | 2.03E-53 | -0.6441051 | 1.53E-38   |
| IL2RA      | 0.746419504 | 0.64068786 | -0.220365  | 7.71E-56 | 2.05E-53 | -0.3983514 | 1.68E-13   |
| CYP3A5     | 0.445444972 | 0.3177299  | -0.4874463 | 9.42E-56 | 2.50E-53 | -0.4548098 | 1.37E-17   |
| LGALS1     | 0.891874438 | 0.77814579 | -0.1968001 | 1.85E-55 | 4.93E-53 | -0.4055536 | 5.58E-14   |
| HOXB-AS3   | 0.305672691 | 0.41771855 | 0.45054355 | 3.19E-55 | 8.48E-53 | -0.5164599 | 5.18E-23   |
| BST2       | 0.548760294 | 0.37093929 | -0.564993  | 4.74E-55 | 1.26E-52 | -0.6754838 | 1.39E-43   |
| SLPI       | 0.549901683 | 0.33852839 | -0.6998969 | 5.24E-55 | 1.39E-52 | -0.5832288 | 2.79E-30   |
| TRAF3IP3   | 0.782878184 | 0.63032998 | -0.3126806 | 7.37E-55 | 1.96E-52 | -0.4638164 | 2.58E-18   |
| CD28       | 0.73503526  | 0.62482725 | -0.2343561 | 7.54E-55 | 2.01E-52 | -0.4201346 | 5.48E-15   |
| HHLA2      | 0.41757745  | 0.3042355  | -0.4568553 | 1.32E-54 | 3.51E-52 | -0.4811527 | 8.99E-20   |
| CASS4      | 0.569734852 | 0.37306724 | -0.610855  | 1.72E-54 | 4.58E-52 | -0.4560124 | 1.10E-17   |
| ZNF454     | 0.121253798 | 0.24591484 | 1.02012884 | 2.07E-54 | 5.51E-52 | -0.3712624 | 8.51E-12   |
| LINC00601  | 0.91118977  | 0.76963667 | -0.243574  | 6.69E-54 | 1.78E-51 | -0.4616539 | 3.88E-18   |
| ACSM5      | 0.585471485 | 0.44877132 | -0.3836184 | 9.38E-54 | 2.50E-51 | -0.4738956 | 3.75E-19   |
| C5orf46    | 0.74853784  | 0.68799005 | -0.1216875 | 1.40E-53 | 3.73E-51 | -0.3248056 | 3.19E-09   |
| ZNF492     | 0.034159611 | 0.14745183 | 2.10988022 | 1.73E-53 | 4.59E-51 | -0.5006175 | 1.64E-21   |
| AC005498.3 | 0.038428209 | 0.21165219 | 2.46145776 | 3.17E-53 | 8.44E-51 | -0.4383499 | 2.57E-16   |
| PRF1       | 0.738406973 | 0.67269262 | -0.1344687 | 5.51E-53 | 1.47E-50 | -0.3761601 | 4.30E-12   |

|            |             |            |            |          |          |            |          |
|------------|-------------|------------|------------|----------|----------|------------|----------|
| SLC17A3    | 0.787911561 | 0.62211539 | -0.3408515 | 7.79E-53 | 2.07E-50 | -0.4010563 | 1.12E-13 |
| USP44      | 0.331072181 | 0.45726179 | 0.46587459 | 1.11E-52 | 2.96E-50 | -0.3273091 | 2.38E-09 |
| TCF19      | 0.821530167 | 0.71618342 | -0.1979844 | 1.75E-52 | 4.66E-50 | -0.4219578 | 4.07E-15 |
| ZNF582     | 0.087459064 | 0.19594396 | 1.16376132 | 2.01E-52 | 5.36E-50 | -0.5588672 | 1.95E-27 |
| LBP        | 0.636082575 | 0.55879045 | -0.1869067 | 2.04E-52 | 5.41E-50 | -0.4734149 | 4.12E-19 |
| HOXB6      | 0.641467117 | 0.8655044  | 0.43216584 | 3.34E-52 | 8.88E-50 | -0.3729258 | 6.76E-12 |
| TRAV36DV7  | 0.892029022 | 0.72440919 | -0.3002858 | 3.34E-52 | 8.88E-50 | -0.4345223 | 4.96E-16 |
| ZNF503-AS1 | 0.350581409 | 0.45350907 | 0.3713819  | 6.15E-52 | 1.64E-49 | -0.423806  | 3.00E-15 |
| ADAM28     | 0.51074373  | 0.36305557 | -0.4924092 | 1.29E-51 | 3.42E-49 | -0.3368071 | 7.57E-10 |
| CCDC181    | 0.237169269 | 0.32030302 | 0.43352033 | 1.48E-51 | 3.93E-49 | -0.3309259 | 1.54E-09 |
| BATF       | 0.746125289 | 0.67361377 | -0.1474963 | 5.42E-51 | 1.44E-48 | -0.5300522 | 2.31E-24 |
| ZNF300P1   | 0.227291693 | 0.34120468 | 0.58609247 | 2.82E-50 | 7.50E-48 | -0.5982916 | 3.67E-32 |
| AGXT2      | 0.593529127 | 0.47810178 | -0.3120011 | 2.85E-50 | 7.58E-48 | -0.4293692 | 1.19E-15 |
| HOXA-AS2   | 0.333507179 | 0.46090173 | 0.46674135 | 5.03E-50 | 1.34E-47 | -0.3648513 | 2.04E-11 |
| GGT6       | 0.442601302 | 0.59049458 | 0.41591613 | 5.83E-50 | 1.55E-47 | -0.4205605 | 5.11E-15 |
| SLAMF7     | 0.480900478 | 0.38733881 | -0.3121423 | 7.58E-50 | 2.02E-47 | -0.3298665 | 1.75E-09 |
| ABHD11-AS  | 0.450732899 | 0.33534072 | -0.4266451 | 8.33E-50 | 2.21E-47 | -0.5566315 | 3.46E-27 |
| PRR15L     | 0.406948663 | 0.51547659 | 0.34106009 | 1.16E-49 | 3.10E-47 | -0.5578931 | 2.50E-27 |
| CCL20      | 0.878378137 | 0.78429305 | -0.1634493 | 1.29E-49 | 3.44E-47 | -0.4728324 | 4.62E-19 |
| MTHFR      | 0.300094332 | 0.18282898 | -0.7149213 | 1.83E-49 | 4.86E-47 | -0.4643856 | 2.32E-18 |
| SASH3      | 0.628031367 | 0.52472028 | -0.2592881 | 1.86E-49 | 4.96E-47 | -0.6266797 | 5.45E-36 |
| TINAG      | 0.568616726 | 0.43522642 | -0.3856904 | 3.56E-49 | 9.47E-47 | -0.349579  | 1.53E-10 |
| ITGB8      | 0.743209    | 0.59541967 | -0.3198611 | 4.08E-49 | 1.08E-46 | -0.3433946 | 3.35E-10 |
| SP140L     | 0.405063867 | 0.30206347 | -0.4232977 | 4.71E-49 | 1.25E-46 | -0.5906741 | 3.38E-31 |
| ITGA2      | 0.453030365 | 0.34745543 | -0.3827798 | 5.40E-49 | 1.44E-46 | -0.3227275 | 4.07E-09 |
| HSPB7      | 0.738021882 | 0.84198176 | 0.19012539 | 7.53E-49 | 2.00E-46 | -0.3723202 | 7.35E-12 |
| VCAM1      | 0.566018259 | 0.4532341  | -0.3205922 | 1.49E-48 | 3.97E-46 | -0.4051772 | 5.91E-14 |
| RBBP8NL    | 0.639970249 | 0.7268934  | 0.18373897 | 7.61E-48 | 2.02E-45 | -0.4724936 | 4.93E-19 |
| ZNF471     | 0.073231016 | 0.21349966 | 1.54370709 | 8.78E-48 | 2.34E-45 | -0.7192633 | 9.29E-52 |
| OSM        | 0.698762444 | 0.56101368 | -0.3167661 | 1.14E-47 | 3.02E-45 | -0.3965404 | 2.21E-13 |
| ANXA2R     | 0.492990142 | 0.2839234  | -0.7960571 | 1.26E-47 | 3.35E-45 | -0.3304583 | 1.63E-09 |
| ZNF577     | 0.203912031 | 0.33222661 | 0.70422075 | 1.41E-47 | 3.74E-45 | -0.6527374 | 7.19E-40 |
| SLC12A3    | 0.736057198 | 0.8036557  | 0.12675969 | 2.35E-47 | 6.24E-45 | -0.4559657 | 1.11E-17 |
| LINC01233  | 0.19542676  | 0.32651507 | 0.74052155 | 3.95E-47 | 1.05E-44 | -0.3678252 | 1.36E-11 |
| ZNF208     | 0.211850147 | 0.31471135 | 0.57098508 | 4.42E-47 | 1.18E-44 | -0.5774192 | 1.40E-29 |
| AC009506.1 | 0.081187836 | 0.16960409 | 1.06283546 | 1.79E-46 | 4.77E-44 | -0.4100549 | 2.76E-14 |
| RDH5       | 0.533536739 | 0.34974811 | -0.6092714 | 2.03E-46 | 5.39E-44 | -0.3434247 | 3.33E-10 |
| ZNF300     | 0.240389324 | 0.35112453 | 0.54660996 | 3.22E-46 | 8.57E-44 | -0.536987  | 4.47E-25 |
| SLC15A2    | 0.381293772 | 0.49886492 | 0.38774624 | 3.68E-46 | 9.78E-44 | -0.3189139 | 6.32E-09 |
| CLEC2B     | 0.515210136 | 0.37612085 | -0.4539647 | 3.71E-46 | 9.88E-44 | -0.416978  | 9.14E-15 |
| LINC01093  | 0.655893967 | 0.59980569 | -0.1289674 | 1.74E-45 | 4.64E-43 | -0.3334503 | 1.14E-09 |
| NROB2      | 0.592953439 | 0.67839869 | 0.19421456 | 6.07E-45 | 1.61E-42 | -0.3393151 | 5.56E-10 |
| MIR210HG   | 0.629817026 | 0.46769215 | -0.4293735 | 1.81E-44 | 4.81E-42 | -0.567899  | 1.83E-28 |
| CMTM3      | 0.299175332 | 0.17403063 | -0.78165   | 4.48E-44 | 1.19E-41 | -0.4392855 | 2.18E-16 |
| RNF180     | 0.056218212 | 0.11715946 | 1.05936404 | 5.90E-44 | 1.57E-41 | -0.4064719 | 4.83E-14 |
| C8orf22    | 0.593553991 | 0.48390064 | -0.2946684 | 2.57E-43 | 6.82E-41 | -0.4937908 | 6.88E-21 |
| PGA5       | 0.738977334 | 0.59850951 | -0.3041559 | 3.86E-43 | 1.03E-40 | -0.463469  | 2.76E-18 |
| TM4SF19    | 0.66596184  | 0.56475852 | -0.2378054 | 7.41E-43 | 1.97E-40 | -0.4751851 | 2.92E-19 |
| SFN        | 0.763673497 | 0.67699929 | -0.1738016 | 1.61E-42 | 4.28E-40 | -0.6753925 | 1.44E-43 |
| AC008074.1 | 0.418272069 | 0.30794957 | -0.4417476 | 1.99E-42 | 5.29E-40 | -0.3328349 | 1.23E-09 |
| SOCS3      | 0.599482555 | 0.42216016 | -0.5059273 | 2.07E-42 | 5.50E-40 | -0.3330101 | 1.20E-09 |
| RGS1       | 0.860225296 | 0.75689996 | -0.1846119 | 6.13E-42 | 1.63E-39 | -0.3415616 | 4.21E-10 |
| S1PR4      | 0.733465481 | 0.61699389 | -0.2494729 | 9.00E-42 | 2.39E-39 | -0.4577405 | 8.02E-18 |
| SLC9A3R1   | 0.569187274 | 0.43703718 | -0.3811474 | 9.18E-42 | 2.44E-39 | -0.5736074 | 3.96E-29 |
| DCAF4L2    | 0.884337858 | 0.85994784 | -0.0403485 | 1.13E-41 | 3.01E-39 | -0.7222681 | 2.24E-52 |
| PES1P1     | 0.822454056 | 0.79665977 | -0.0459714 | 1.42E-41 | 3.79E-39 | -0.4526114 | 2.05E-17 |
| AVPR1B     | 0.235883274 | 0.18551996 | -0.3464987 | 3.73E-41 | 9.92E-39 | -0.5132841 | 1.05E-22 |
| ZSCAN1     | 0.246307614 | 0.32003971 | 0.37778969 | 4.87E-41 | 1.29E-38 | -0.4677388 | 1.23E-18 |
| GPR65      | 0.857761123 | 0.75648884 | -0.1812571 | 5.77E-41 | 1.54E-38 | -0.4562845 | 1.05E-17 |
| HOXD3      | 0.326553916 | 0.42138659 | 0.36782319 | 6.72E-41 | 1.79E-38 | -0.403552  | 7.60E-14 |
| CMYA5      | 0.286352092 | 0.39485771 | 0.46354272 | 3.70E-40 | 9.85E-38 | -0.3488151 | 1.68E-10 |

|            |             |            |            |          |          |            |          |
|------------|-------------|------------|------------|----------|----------|------------|----------|
| SLC19A2    | 0.690304141 | 0.79941428 | 0.2117112  | 6.20E-40 | 1.65E-37 | -0.4479693 | 4.73E-17 |
| AC003984.1 | 0.585844    | 0.47261258 | -0.3098585 | 3.38E-39 | 8.98E-37 | -0.5401115 | 2.11E-25 |
| ANGPTL1    | 0.581738251 | 0.72721955 | 0.32202082 | 5.77E-39 | 1.54E-36 | -0.3934049 | 3.54E-13 |
| AQP1       | 0.505841897 | 0.35768555 | -0.4999947 | 1.13E-38 | 3.01E-36 | -0.6807421 | 1.72E-44 |
| TACSTD2    | 0.164821032 | 0.29798397 | 0.85433439 | 1.16E-38 | 3.10E-36 | -0.5924157 | 2.04E-31 |
| BHMT       | 0.450426706 | 0.34480969 | -0.385492  | 1.55E-38 | 4.12E-36 | -0.644024  | 1.57E-38 |
| LST1       | 0.521547953 | 0.45588666 | -0.1941247 | 4.40E-38 | 1.17E-35 | -0.3549585 | 7.61E-11 |
| UGT1A8     | 0.865940541 | 0.80827925 | -0.0994142 | 9.62E-38 | 2.56E-35 | -0.4749987 | 3.03E-19 |
| ZNF418     | 0.184993317 | 0.26101813 | 0.49667684 | 1.90E-37 | 5.05E-35 | -0.5995832 | 2.51E-32 |
| PRSS44     | 0.135402133 | 0.20974456 | 0.63138291 | 2.24E-37 | 5.95E-35 | -0.3178941 | 7.10E-09 |
| PABPC1P4   | 0.323802199 | 0.46417636 | 0.51956026 | 2.43E-37 | 6.45E-35 | -0.3258258 | 2.83E-09 |
| SLC39A5    | 0.614480658 | 0.50529684 | -0.2822364 | 5.97E-37 | 1.59E-34 | -0.6387135 | 9.80E-38 |
| TXLNB      | 0.283202792 | 0.17913812 | -0.6607631 | 1.06E-36 | 2.82E-34 | -0.3397131 | 5.29E-10 |
| LTA        | 0.746499583 | 0.68906919 | -0.1154926 | 1.50E-36 | 4.00E-34 | -0.5858948 | 1.32E-30 |
| DAPP1      | 0.648364709 | 0.57347092 | -0.1770852 | 4.83E-36 | 1.28E-33 | -0.3392222 | 5.62E-10 |
| UCN2       | 0.826689768 | 0.73501956 | -0.1695634 | 2.67E-34 | 7.10E-32 | -0.317921  | 7.08E-09 |
| CD3D       | 0.792525623 | 0.71325584 | -0.1520379 | 2.74E-34 | 7.29E-32 | -0.3975591 | 1.90E-13 |
| RXFP4      | 0.433628602 | 0.55572022 | 0.35789881 | 3.37E-34 | 8.97E-32 | -0.3500917 | 1.43E-10 |
| SENP8      | 0.907836002 | 0.81642779 | -0.1531064 | 4.18E-34 | 1.11E-31 | -0.3829411 | 1.64E-12 |
| ABCA4      | 0.5627749   | 0.60531026 | 0.10511683 | 4.37E-34 | 1.16E-31 | -0.6577387 | 1.17E-40 |
| IL2RG      | 0.625111885 | 0.5030587  | -0.3133877 | 6.60E-34 | 1.76E-31 | -0.4235171 | 3.15E-15 |
| OTOR       | 0.828749203 | 0.7942184  | -0.0613998 | 1.68E-33 | 4.47E-31 | -0.3994781 | 1.42E-13 |
| ZBTB42     | 0.49830346  | 0.42624395 | -0.2253452 | 1.86E-33 | 4.95E-31 | -0.6279689 | 3.57E-36 |
| CSAG1      | 0.770108973 | 0.72224029 | -0.0925837 | 2.23E-33 | 5.93E-31 | -0.4464455 | 6.20E-17 |
| DOPEY2     | 0.594172502 | 0.55608875 | -0.0955667 | 9.11E-33 | 2.42E-30 | -0.5773893 | 1.41E-29 |
| TMEM173    | 0.32136467  | 0.23117771 | -0.475209  | 1.51E-32 | 4.02E-30 | -0.6140384 | 3.08E-34 |
| TNFSF4     | 0.671183832 | 0.59762995 | -0.1674555 | 2.74E-32 | 7.30E-30 | -0.3343908 | 1.02E-09 |
| C19orf67   | 0.563794782 | 0.46319288 | -0.283557  | 6.02E-32 | 1.60E-29 | -0.5738085 | 3.75E-29 |
| CKMT2      | 0.510507092 | 0.61570524 | 0.27030885 | 6.65E-32 | 1.77E-29 | -0.5764546 | 1.82E-29 |
| KRT15      | 0.678397751 | 0.61912446 | -0.1319019 | 7.86E-32 | 2.09E-29 | -0.4802607 | 1.07E-19 |
| PFN1       | 0.79188816  | 0.61048626 | -0.3753379 | 1.43E-31 | 3.80E-29 | -0.3280023 | 2.19E-09 |
| LY96       | 0.634642177 | 0.55372438 | -0.1967754 | 1.59E-31 | 4.23E-29 | -0.6545933 | 3.68E-40 |
| AOC1       | 0.573344978 | 0.52749797 | -0.1202379 | 1.64E-31 | 4.37E-29 | -0.3190586 | 6.22E-09 |
| LAIR1      | 0.43272562  | 0.35988374 | -0.2659216 | 2.72E-31 | 7.24E-29 | -0.3558909 | 6.74E-11 |
| ALDOC      | 0.426561686 | 0.36155662 | -0.2385328 | 2.96E-31 | 7.86E-29 | -0.7101166 | 6.33E-50 |
| DQX1       | 0.773972926 | 0.71661213 | -0.1110906 | 6.56E-31 | 1.74E-28 | -0.4625169 | 3.30E-18 |
| TOX3       | 0.313560129 | 0.3524617  | 0.16872439 | 1.09E-30 | 2.90E-28 | -0.3398134 | 5.23E-10 |
| HP         | 0.538989241 | 0.4794643  | -0.1688331 | 1.27E-30 | 3.38E-28 | -0.544492  | 7.25E-26 |
| C11orf53   | 0.726825242 | 0.69141705 | -0.0720523 | 2.87E-30 | 7.62E-28 | -0.3801048 | 2.46E-12 |
| KRT17      | 0.680596081 | 0.59340715 | -0.1977765 | 6.80E-30 | 1.81E-27 | -0.4652854 | 1.96E-18 |
| LSR        | 0.044625749 | 0.05635227 | 0.33659737 | 1.70E-29 | 4.52E-27 | -0.3820452 | 1.86E-12 |
| EVI2A      | 0.895181612 | 0.80832208 | -0.1472501 | 1.74E-29 | 4.63E-27 | -0.4652769 | 1.96E-18 |
| VTCN1      | 0.567005944 | 0.6052883  | 0.09425861 | 8.11E-28 | 2.16E-25 | -0.3929392 | 3.80E-13 |
| CCDC8      | 0.339028487 | 0.45445323 | 0.42272532 | 8.37E-28 | 2.23E-25 | -0.803562  | 5.89E-73 |
| FAXDC2     | 0.205830006 | 0.27685114 | 0.42765713 | 9.47E-28 | 2.52E-25 | -0.622874  | 1.87E-35 |
| MAGEC2     | 0.814342286 | 0.75542977 | -0.1083377 | 1.99E-27 | 5.29E-25 | -0.4745676 | 3.29E-19 |
| HIST3H2A   | 0.058873261 | 0.14345096 | 1.28487312 | 4.38E-27 | 1.17E-24 | -0.4688145 | 1.00E-18 |
| ZNF888     | 0.801174117 | 0.66737686 | -0.2636142 | 5.26E-27 | 1.40E-24 | -0.4333495 | 6.06E-16 |
| CD3E       | 0.454622814 | 0.41513201 | -0.1310999 | 5.90E-27 | 1.57E-24 | -0.3762556 | 4.24E-12 |
| AC083900.1 | 0.925400025 | 0.85611308 | -0.1122758 | 2.67E-26 | 7.09E-24 | -0.5849595 | 1.72E-30 |
| MAGEB1     | 0.856104555 | 0.80280605 | -0.0927355 | 4.19E-26 | 1.11E-23 | -0.5323198 | 1.36E-24 |
| FMO2       | 0.528755439 | 0.43607852 | -0.2780127 | 6.66E-26 | 1.77E-23 | -0.6173484 | 1.09E-34 |
| XAGE5      | 0.765070006 | 0.7178789  | -0.0918513 | 1.08E-24 | 2.88E-22 | -0.546685  | 4.22E-26 |
| KCNJ1      | 0.504788486 | 0.55347193 | 0.13283114 | 3.12E-24 | 8.30E-22 | -0.3176319 | 7.32E-09 |
| CABP4      | 0.801572271 | 0.77353492 | -0.0513662 | 6.73E-24 | 1.79E-21 | -0.3641633 | 2.24E-11 |
| KRTCAP3    | 0.450190784 | 0.57529649 | 0.35376914 | 4.11E-23 | 1.09E-20 | -0.765409  | 2.95E-62 |
| CD5        | 0.792796658 | 0.73745254 | -0.1044007 | 4.51E-23 | 1.20E-20 | -0.4092001 | 3.15E-14 |
| GOLGA6L2   | 0.766540574 | 0.7053604  | -0.1200016 | 6.86E-23 | 1.83E-20 | -0.4347328 | 4.79E-16 |
| CDH16      | 0.360074716 | 0.4219852  | 0.22889609 | 2.21E-22 | 5.88E-20 | -0.4795833 | 1.23E-19 |
| MT1E       | 0.087419551 | 0.16813249 | 0.9435707  | 1.12E-21 | 2.99E-19 | -0.4293932 | 1.18E-15 |
| BTNL3      | 0.626661037 | 0.56574001 | -0.1475461 | 2.17E-21 | 5.76E-19 | -0.3201204 | 5.50E-09 |

|           |             |            |            |            |            |            |           |
|-----------|-------------|------------|------------|------------|------------|------------|-----------|
| HOXC10    | 0.124474008 | 0.10893422 | -0.1923873 | 2.55E-21   | 6.78E-19   | -0.4877101 | 2.40E-20  |
| HSD17B14  | 0.39738273  | 0.3548458  | -0.1633369 | 6.62E-20   | 1.76E-17   | -0.466345  | 1.60E-18  |
| AKR1B1    | 0.278232067 | 0.25447149 | -0.1287847 | 1.51E-19   | 4.01E-17   | -0.5099605 | 2.19E-22  |
| LINC01151 | 0.717012448 | 0.59905523 | -0.2593091 | 2.52E-19   | 6.69E-17   | -0.4131207 | 1.70E-14  |
| SMIM3     | 0.494222369 | 0.43473589 | -0.1850211 | 2.74E-19   | 7.28E-17   | -0.7653048 | 3.13E-62  |
| PAGE1     | 0.51862802  | 0.47684973 | -0.1211655 | 3.25E-19   | 8.64E-17   | -0.3324871 | 1.28E-09  |
| SLC27A2   | 0.688250978 | 0.57814568 | -0.2515017 | 5.11E-19   | 1.36E-16   | -0.4621691 | 3.52E-18  |
| HIF1A-AS2 | 0.243095718 | 0.20760335 | -0.2276947 | 1.75E-18   | 4.67E-16   | -0.5126823 | 1.20E-22  |
| FABP7     | 0.748029026 | 0.63923622 | -0.2267451 | 1.87E-18   | 4.97E-16   | -0.642258  | 2.90E-38  |
| PGF       | 0.385625989 | 0.35230863 | -0.1303625 | 4.32E-18   | 1.15E-15   | -0.6407899 | 4.81E-38  |
| SLC10A5   | 0.714909721 | 0.53244905 | -0.4251176 | 7.85E-18   | 2.09E-15   | -0.4021596 | 9.42E-14  |
| PCGEM1    | 0.84849339  | 0.72234245 | -0.2322205 | 1.05E-17   | 2.80E-15   | -0.4481246 | 4.60E-17  |
| FMR1NB    | 0.948374906 | 0.92294795 | -0.0392082 | 1.23E-17   | 3.26E-15   | -0.50132   | 1.41E-21  |
| TMEM244   | 0.762389641 | 0.72912925 | -0.0643539 | 1.67E-17   | 4.45E-15   | -0.399729  | 1.37E-13  |
| RNF149    | 0.807127239 | 0.74334434 | -0.1187655 | 5.85E-16   | 1.56E-13   | -0.323691  | 3.64E-09  |
| RAB30-AS1 | 0.327695803 | 0.43133425 | 0.39644907 | 1.84E-15   | 4.89E-13   | -0.3635884 | 2.42E-11  |
| PAGE5     | 0.636053763 | 0.59637943 | -0.0929182 | 2.35E-15   | 6.24E-13   | -0.4251804 | 2.39E-15  |
| PPP1R2P10 | 0.834209458 | 0.85903763 | 0.04231166 | 3.35E-15   | 8.91E-13   | -0.5789435 | 9.19E-30  |
| PON3      | 0.464661842 | 0.50724284 | 0.12649542 | 1.89E-14   | 5.04E-12   | -0.5860266 | 1.27E-30  |
| TRIP13    | 0.914136261 | 0.88719183 | -0.0431631 | 2.09E-14   | 5.56E-12   | -0.4647386 | 2.17E-18  |
| CHRNA9    | 0.593840671 | 0.60854905 | 0.03529765 | 2.11E-14   | 5.62E-12   | -0.3650278 | 2.00E-11  |
| TM4SF18   | 0.241748804 | 0.20182593 | -0.2603972 | 2.61E-14   | 6.95E-12   | -0.5003301 | 1.74E-21  |
| POF1B     | 0.638368148 | 0.55124687 | -0.2116901 | 5.23E-14   | 1.39E-11   | -0.6070526 | 2.66E-33  |
| NUDT13    | 0.522746183 | 0.50086566 | -0.0616869 | 7.73E-13   | 2.06E-10   | -0.3652903 | 1.93E-11  |
| IGFBP7    | 0.262771126 | 0.28006563 | 0.09195818 | 8.22E-13   | 2.19E-10   | -0.3714096 | 8.34E-12  |
| ZNF382    | 0.050981852 | 0.09845267 | 0.94944648 | 1.25E-12   | 3.32E-10   | -0.6369586 | 1.78E-37  |
| PAGE3     | 0.859308233 | 0.81069129 | -0.0840231 | 1.64E-12   | 4.35E-10   | -0.4383427 | 2.57E-16  |
| ZNF280A   | 0.638455115 | 0.60506244 | -0.0775012 | 2.54E-12   | 6.75E-10   | -0.321413  | 4.74E-09  |
| XAF1      | 0.366506141 | 0.31356702 | -0.2250636 | 3.64E-12   | 9.68E-10   | -0.4229309 | 3.47E-15  |
| PAGE2B    | 0.821118355 | 0.79816797 | -0.0408978 | 4.29E-12   | 1.14E-09   | -0.5432453 | 9.84E-26  |
| EPO       | 0.102589584 | 0.15394952 | 0.58557312 | 3.00E-11   | 7.97E-09   | -0.3761688 | 4.30E-12  |
| SERPINF1  | 0.513624633 | 0.48354763 | -0.0870564 | 3.95E-11   | 1.05E-08   | -0.6356401 | 2.78E-37  |
| C1orf116  | 0.721599653 | 0.75439865 | 0.06412845 | 1.64E-10   | 4.36E-08   | -0.5741619 | 3.40E-29  |
| C2CD4D    | 0.166366915 | 0.13778191 | -0.2719821 | 5.01E-10   | 1.33E-07   | -0.4466112 | 6.02E-17  |
| RGPD2     | 0.366810635 | 0.42322042 | 0.20637379 | 5.99E-10   | 1.59E-07   | -0.3825508 | 1.73E-12  |
| PLA2G12B  | 0.692466112 | 0.62901194 | -0.1386561 | 6.23E-10   | 1.66E-07   | -0.6655879 | 6.29E-42  |
| CRYZ      | 0.117033679 | 0.1083081  | -0.1117826 | 7.15E-10   | 1.90E-07   | -0.4053394 | 5.77E-14  |
| EVC2      | 0.474504845 | 0.47057643 | -0.0119938 | 2.09E-09   | 5.57E-07   | -0.6234331 | 1.56E-35  |
| WWC2-AS2  | 0.621523776 | 0.69285663 | 0.15674726 | 3.51E-09   | 9.33E-07   | -0.4252637 | 2.36E-15  |
| MKRN3     | 0.755362489 | 0.71852506 | -0.0721307 | 1.15E-08   | 3.06E-06   | -0.667288  | 3.30E-42  |
| LCN12     | 0.511422352 | 0.52734887 | 0.04424249 | 1.38E-08   | 3.67E-06   | -0.3580199 | 5.09E-11  |
| RASSF10   | 0.132241365 | 0.23365208 | 0.82118833 | 3.21E-08   | 8.54E-06   | -0.3517212 | 1.16E-10  |
| SPINT2    | 0.062509924 | 0.07039313 | 0.17134937 | 4.13E-08   | 1.10E-05   | -0.5218761 | 1.53E-23  |
| SSX9      | 0.862752114 | 0.82552908 | -0.0636271 | 9.84E-08   | 2.62E-05   | -0.3600977 | 3.87E-11  |
| S100A4    | 0.55254661  | 0.57795495 | 0.06486088 | 1.98E-07   | 5.26E-05   | -0.4583746 | 7.13E-18  |
| TGM1      | 0.863030556 | 0.83690586 | -0.0443463 | 2.68E-07   | 7.13E-05   | -0.672783  | 3.99E-43  |
| EHF       | 0.549980232 | 0.57778019 | 0.07114097 | 2.92E-07   | 7.77E-05   | -0.3553059 | 7.28E-11  |
| PAGE2     | 0.801822844 | 0.78779086 | -0.0254708 | 9.12E-07   | 0.00024272 | -0.3566912 | 6.07E-11  |
| FAM153A   | 0.528660534 | 0.56134067 | 0.08653495 | 1.27E-06   | 0.00033694 | -0.358532  | 4.76E-11  |
| ODAM      | 0.731003739 | 0.73652869 | 0.01086294 | 1.34E-06   | 0.00035532 | -0.4156576 | 1.13E-14  |
| CLEC18C   | 0.541279483 | 0.52510716 | -0.0437618 | 2.73E-06   | 0.00072626 | -0.4253278 | 2.33E-15  |
| FOX11     | 0.670659787 | 0.68620116 | 0.03305047 | 7.67E-06   | 0.00204069 | -0.3499356 | 1.46E-10  |
| CRYAB     | 0.229524347 | 0.21736462 | -0.0785301 | 8.11E-06   | 0.00215801 | -0.3705741 | 9.36E-12  |
| NUDT12    | 0.244337703 | 0.24064523 | -0.0219686 | 1.74E-05   | 0.0046375  | -0.4910526 | 1.21E-20  |
| DCAF12L1  | 0.434590218 | 0.49032443 | 0.17408093 | 6.41E-05   | 0.01705343 | -0.6366119 | 2.00E-37  |
| DEFB1     | 0.280649979 | 0.2940125  | 0.06710553 | 8.74E-05   | 0.02323598 | -0.3406426 | 4.72E-10  |
| XIST      | 0.833775652 | 0.81145544 | -0.0391474 | 9.26E-05   | 0.02463176 | -0.8747183 | 4.12E-101 |
| HOXA10-AS | 0.134208187 | 0.16036768 | 0.25691076 | 0.00011276 | 0.02999306 | -0.5824708 | 3.45E-30  |
| ABCA6     | 0.491783527 | 0.44627512 | -0.14009   | 0.00016563 | 0.04405691 | -0.3464768 | 2.27E-10  |
| AKR7A3    | 0.205926668 | 0.22611196 | 0.13490665 | 0.00018428 | 0.04901723 | -0.3647446 | 2.07E-11  |
